# Supplementary material for: Epigenetic upregulation of HOXC10 in non-small lung cancer cells
Source: publisher site journal article supplement (doi:10.18632/aging.103597), 2020-07-19
Supplement: Supplementary file [file aging-v12i17-103597-supplementary-material-SD1.pdf]

# SUPPLEMENTARY FIGURE

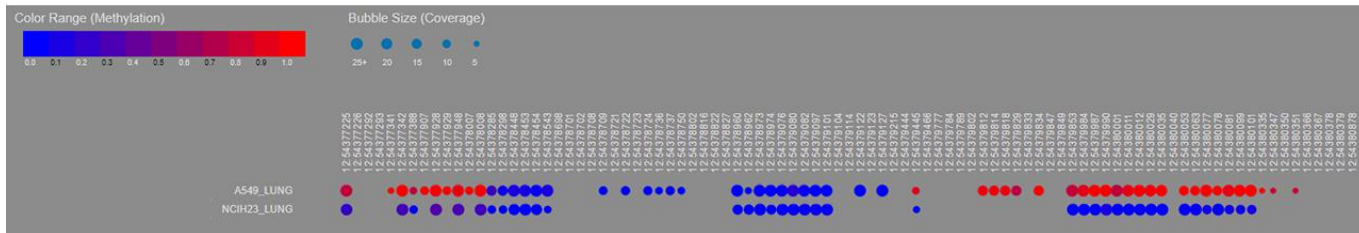

Supplementary Figure 1. Methylation profiles in the HOXC10 CpG island between A549 and NCI-H23 cells.
